# Supplementary material
Source: PubMed Central journal article supplement (PMC3555096)
Supplement: ismej2012105x2.pdf [file ismej2012105x2.pdf]

## Supplementary Information

**Table S1. Well depths, diameters, screened intervals, and microcosm suspension depths during experiments conducted September-October 2009.**

| Informal Well Name     | State Well Number | Location  |                   | Total Depth <sup>2</sup> | Schedule 80 PVC (4" diameter) | Schedule 120 PVC (2" diameter) | Screened Interval Depth <sup>2</sup> | Microcosm Depth <sup>2</sup> |
|------------------------|-------------------|-----------|-------------------|--------------------------|-------------------------------|--------------------------------|--------------------------------------|------------------------------|
|                        |                   | Lat       | Long <sup>1</sup> |                          |                               |                                |                                      |                              |
| Girl Scout Deep        | DX-68-23-619A     | 29.707500 | -98.136111        | 240                      | 0-24                          | 24-228                         | 228-240                              | 23                           |
| Girl Scout Shallow     | DX-68-23-619B     | 29.707500 | -98.136111        | 198                      | 0-24                          | 24-185                         | 185-198                              | 31                           |
| LCRA Deep              | DX-68-23-617      | 29.705833 | -98.134444        | 226                      | 0-30                          | 30-213                         | 213-226                              | 18                           |
| LCRA Shallow           | DX-68-23-618      | 29.705833 | -98.134444        | 201                      | 0-30 <sup>3</sup>             | 30-186 <sup>3</sup>            | 186-201 <sup>3</sup>                 | 18                           |
| Paradise Alley Deep    | DX-68-23-616B     | 29.704444 | -98.133056        | 223                      | 0-23                          | 23-207                         | 207-223                              | 23                           |
| Paradise Alley Shallow | DX-68-23-616A     | 29.704444 | -98.133056        | 173                      | 0-23                          | 23-158                         | 158-173                              | 23                           |

<sup>1</sup> Latitude and longitude measurements in decimal degrees (DCM)

<sup>2</sup> all measurements in meters

<sup>3</sup> approximated due to absence of driller's logs
