# Supplementary material
Source: PubMed Central journal article supplement (PMC3555096)
Supplement: ismej2012105x3.pdf [file ismej2012105x3.pdf]

C.J. Gray and A.S. Engel - “Microbial diversity and impact on carbonate geochemistry across a changing geochemical gradient in a karst aquifer”

Supplemental Information

**Table S2. Operational Taxonomic Units (OTUs) of all clone libraries defined at 98% sequence identity. Red shading is for OTUs from all sites; orange shading for 4 sites; yellow for 3 sites, and brown shading for 2 sites.**

| Major Taxonomic Class or Phylum | Representative Clone | Accession Number | Closest Relative                                                   | Accession Number | % Similarity | Occurrence of clones in OTU per site |                    |           |              |                        |
|---------------------------------|----------------------|------------------|--------------------------------------------------------------------|------------------|--------------|--------------------------------------|--------------------|-----------|--------------|------------------------|
|                                 |                      |                  |                                                                    |                  |              | Girl Scout Deep                      | Girl Scout Shallow | LCRA Deep | LCRA Shallow | Paradise Alley Shallow |
| <i>Alphaproteobacteria</i>      | EDW07B001_84         | HM066242         | Lower Kane Cave wall biofilm clone LKC_Acid_196                    | EU038058         | 99           | 4                                    | 0                  | 0         | 0            | 14                     |
|                                 | EDW07B006_69         | HM066678         | Xiangjiang River <i>Rhizobium</i> sp. XJ-L72 clone                 | EU817493         | 98           | 1                                    | 0                  | 0         | 0            | 0                      |
|                                 | EDW07B005_130        | HM066595         | Phyllosphere <i>Agrobacterium</i> sp. M11 clone                    | GU086439         | 99           | 5                                    | 3                  | 0         | 2            | 0                      |
|                                 | EDW07B003_49         | HM066517         | Dust isolate <i>Rhizobium huautlense</i> OS-49.b.                  | AM237359         | 100          | 0                                    | 0                  | 0         | 1            | 0                      |
|                                 | EDW07B003_68         | HM066652         | <i>Mesorhizobium ciceri</i> strain C-2/2                           | AY206686         | 96           | 0                                    | 0                  | 0         | 1            | 0                      |
|                                 | EDW07B003_109        | HM066498         | Drinking water treatment biofilms <i>Xanthobacter</i> sp. Clone    | FJ572674         | 99           | 0                                    | 0                  | 0         | 2            | 0                      |
|                                 | EDW07B003_53         | HM066519         | <i>Bosea massiliensis</i> strain 63287                             | NR025118         | 99           | 0                                    | 0                  | 0         | 1            | 0                      |
|                                 | EDW07B001_32         | HM066286         | <i>Dechlorospirillum</i> sp. DB                                    | AY530551         | 97           | 0                                    | 0                  | 0         | 0            | 1                      |
|                                 | EDW07B001_85         | HM066243         | Washing water clone ATB-LH-6119                                    | FJ535117         | 99           | 0                                    | 2                  | 1         | 0            | 3                      |
|                                 | EDW07B003_91         | HM066485         | Lake Tanganyika anoxic hypolimnion clone TK-NH3                    | DQ463742         | 97           | 0                                    | 0                  | 0         | 1            | 0                      |
|                                 | EDW07B003_114        | HM066503         | Lake Tanganyika anoxic hypolimnion clone TK-NH3                    | DQ463742         | 99           | 0                                    | 0                  | 0         | 1            | 0                      |
|                                 | EDW07B003_40         | HM066514         | Swine effluent contaminated soil, <i>Sphingomonas</i> sp. BBCT69   | DQ337553         | 98           | 0                                    | 0                  | 0         | 1            | 0                      |
|                                 | EDW07B003_29         | HM066510         | Deep-sea sediment <i>Novosphingobium aromaticivorans</i> isolate   | AB025012         | 97           | 0                                    | 0                  | 0         | 2            | 0                      |
|                                 | EDW07B001_118        | HM066314         | Zn-resistant clone <i>Sphingomonas</i> sp. ZnH-1                   | EF061133         | 99           | 0                                    | 2                  | 0         | 0            | 1                      |
|                                 | EDW07B001_92         | HM066248         | Arctic tundra soil clone <i>Sphingomonas</i> sp. DhA-95            | AF177917         | 99           | 0                                    | 0                  | 0         | 0            | 1                      |
|                                 | EDW07B001_55         | HM066296         | <i>Sphingomonadaceae</i> bacterium CBFR-1                          | EF066484         | 99           | 0                                    | 0                  | 0         | 0            | 2                      |
|                                 | EDW07B002_20         | HM066409         | Swine effluent contaminated soil, <i>Sphingomonas</i> sp. BBCT20   | DQ337548         | 96           | 0                                    | 0                  | 1         | 0            | 0                      |
|                                 | EDW07B003_75         | HM066524         | Kartchner Caverns stalactite clone KC-IT-W5                        | FJ711211         | 99           | 0                                    | 0                  | 0         | 1            | 0                      |
|                                 | EDW07B006_43         | HM066662         | <i>Candidatus</i> Reyranelia massiliensis strain URTM1             | EF394922         | 95           | 1                                    | 0                  | 0         | 0            | 0                      |
|                                 | EDW07B001_58         | HM066297         | Arctic glacier sandy sediment <i>Brevundimonas</i> strain Asd M7-3 | FM955876         | 100          | 6                                    | 8                  | 3         | 1            | 7                      |
|                                 | EDW07B001_8          | HM066277         | Alkaline soil <i>Brevundimonas kwangchunensis</i> strain KSL-110   | AY971369         | 98           | 0                                    | 0                  | 0         | 2            | 2                      |
|                                 | EDW07B001_26         | HM066282         | Alkaline groundwater <i>Phenylobacterium falsum</i> strain AC-49T  | AJ717391         | 98           | 0                                    | 0                  | 0         | 0            | 1                      |
|                                 | EDW07B002_38         | HM066351         | Hydrocarbon-contaminated soil <i>Caulobacter</i> clone CM14D1      | AM936876         | 99           | 0                                    | 0                  | 1         | 0            | 0                      |
|                                 | EDW07B003_20         | HM066508         | <i>Caulobacter crescentus</i> NA1000                               | CP001340         | 99           | 2                                    | 5                  | 1         | 2            | 0                      |
|                                 | EDW07B001_1          | HM066203         | Bering Sea surface water clone DBS1a18                             | GQ984314         | 94           | 0                                    | 0                  | 0         | 0            | 1                      |
|                                 | EDW07B001_5          | HM066275         | Lower Kane Cave wall biofilm clone LKC_Acid_196                    | EU038058         | 99           | 3                                    | 0                  | 0         | 0            | 6                      |
|                                 | EDW07B006_39         | HM066720         | Groundwater <i>Rhizobium</i> clone W3                              | EU781656         | 99           | 1                                    | 0                  | 0         | 0            | 0                      |

| Major Taxonomic Class or Phylum | Representative Clone | Closest Relative                                              | Accession #                                                        | % Similarity | Girl Scout Deep | Girl Scout Shallow | LCRA Deep | LCRA Shallow | Paradise Alley Shallow |    |
|---------------------------------|----------------------|---------------------------------------------------------------|--------------------------------------------------------------------|--------------|-----------------|--------------------|-----------|--------------|------------------------|----|
| Gammaproteobacteria             | EDW07B005_145        | HM066627                                                      | <i>Agrobacterium larrymoorei</i>                                   | EU373312     | 99              | 0                  | 1         | 0            | 0                      | 0  |
|                                 | EDW07B003_90         | HM066528                                                      | Drinking water treatment plant <i>Xanthobacter</i> clone           | FJ572674     | 99              | 0                  | 0         | 0            | 1                      | 0  |
|                                 | EDW07B001_11         | HM066279                                                      | Deep-sea sediment isolate <i>Novosphingobium subterraneum</i>      | AB025014     | 97              | 0                  | 0         | 0            | 0                      | 5  |
|                                 | EDW07B005_105        | HM066617                                                      | Deep-sea sediment isolate <i>Novosphingobium aromaticivorans</i>   | AB025012     | 99              | 0                  | 1         | 0            | 1                      | 0  |
|                                 | EDW07B003_65         | HM066521                                                      | Washing water clone ATB-LH-6119                                    | FJ535117     | 99              | 1                  | 2         | 0            | 1                      | 0  |
|                                 | EDW07B001_109        | HM066312                                                      | Dust isolate <i>Sphingomonas</i> sp. PA219                         | AM900782     | 96              | 0                  | 0         | 0            | 0                      | 1  |
|                                 | EDW07B001_80         | HM066306                                                      | <i>Sphingomonadaceae</i> bacterium CBFR-1                          | EF066484     | 99              | 0                  | 0         | 0            | 0                      | 1  |
|                                 | EDW07B001_9          | HM066278                                                      | Arctic glacier sandy sediment <i>Brevundimonas</i> strain Asd M7-3 | FM955876     | 99              | 2                  | 3         | 4            | 4                      | 10 |
|                                 | EDW07B003_18         | HM066507                                                      | Soil <i>Brevundimonas lenta</i> strain DS-18                       | EF363713     | 99              | 0                  | 0         | 0            | 1                      | 0  |
|                                 | EDW07B005_176        | HM066638                                                      | Alkaline soil <i>Brevundimonas kwangchunensis</i> strain KSL-110   | AY971369     | 97              | 0                  | 1         | 0            | 0                      | 0  |
|                                 | EDW07B003_85         | HM066526                                                      | <i>Caulobacter crescentus</i> NA1000                               | CP001340     | 99              | 0                  | 4         | 0            | 1                      | 0  |
|                                 | EDW07B002_87         | HM066420                                                      | Alphaproteobacterium clone A0902                                   | AF236003     | 95              | 0                  | 0         | 1            | 0                      | 0  |
|                                 | EDW07B003_104        | HM066493                                                      | <i>Pseudomonas fluorescens</i> strain Ps 7-12                      | EU854430     | 99              | 19                 | 3         | 0            | 5                      | 0  |
|                                 | EDW07B001_128        | HM066319                                                      | Rhizosphere <i>Pseudomonas poae</i> strain BIHB730                 | DQ536513     | 99              | 2                  | 9         | 0            | 5                      | 13 |
|                                 | EDW07B005_125        | HM066592                                                      | Pb-An mine tailings clone Fe-K6-C35                                | EF612432     | 91              | 0                  | 1         | 0            | 0                      | 0  |
|                                 | EDW07B003_26         | HM066445                                                      | Rhizosphere <i>Pseudomonas poae</i> strain BIHB730                 | DQ536513     | 98              | 0                  | 0         | 0            | 1                      | 0  |
|                                 | EDW07B003_28         | HM066447                                                      | Rhizosphere <i>Pseudomonas migulae</i> strain CT14                 | EU111725     | 98              | 1                  | 0         | 1            | 1                      | 1  |
|                                 | EDW07B005_113        | HM066587                                                      | Deep-sea sediment <i>Pseudomonas</i> 130(2zx) isolate              | AM409194     | 99              | 1                  | 1         | 0            | 0                      | 0  |
|                                 | EDW07B001_86         | HM066244                                                      | Soil and phyllosphere <i>Pseudomonas putida</i>                    | AY958233     | 99              | 2                  | 0         | 0            | 21                     | 4  |
|                                 | EDW07B003_4          | HM066431                                                      | <i>Pseudomonas</i> ACP14                                           | AY464463     | 99              | 0                  | 1         | 0            | 1                      | 0  |
|                                 | EDW07B003_77         | HM066476                                                      | <i>Pseudomonas argentinensis</i> strain HDDMG01                    | EU723817     | 99              | 6                  | 3         | 0            | 1                      | 0  |
|                                 | EDW07B005_129        | HM066594                                                      | <i>Pseudomonas fluorescens</i> strain Mc07                         | EF672049     | 98              | 1                  | 1         | 0            | 0                      | 0  |
|                                 | EDW07B001_87         | HM066245                                                      | Phyllosphere <i>Pseudomonas</i> HhSoUsc                            | AY089990     | 99              | 0                  | 0         | 0            | 11                     | 2  |
|                                 | EDW07B006_73         | HM066682                                                      | Wastewater treatment plant <i>Pseudomonas</i> clone 1-C            | EU305565     | 99              | 1                  | 0         | 0            | 0                      | 0  |
|                                 | EDW07B005_81         | HM066576                                                      | Wastewater treatment plant <i>Acinetobacter</i> strain HPC253      | AY346313     | 99              | 2                  | 3         | 0            | 0                      | 0  |
|                                 | EDW07B002_102        | HM066392                                                      | Himalayan soil sample <i>Pseudomonas</i> SPS-2                     | AM689946     | 96              | 0                  | 0         | 1            | 0                      | 0  |
|                                 | EDW07B002_98         | HM066389                                                      | Hydrocarbon contaminated soil clone AMFG7                          | AM935272     | 97              | 0                  | 0         | 1            | 0                      | 0  |
|                                 | EDW07B005_142        | HM066624                                                      | Soil <i>Pseudomonas rhodesiae</i> strain NO5                       | FJ462694     | 99              | 10                 | 6         | 0            | 2                      | 1  |
|                                 | EDW07B003_56         | HM066520                                                      | <i>Pseudomonas</i> AEBL3                                           | AY247063     | 99              | 0                  | 1         | 0            | 2                      | 1  |
|                                 | EDW07B006_95         | HM066696                                                      | Rhizosphere <i>Pseudomonas</i> clone TM14_39                       | DQ279339     | 95              | 1                  | 0         | 0            | 0                      | 0  |
|                                 | EDW07B005_157        | HM066593                                                      | Hemp water <i>Pseudomonas argentinensis</i> strain HDDMG01         | EU723817     | 99              | 2                  | 1         | 0            | 0                      | 0  |
|                                 | EDW07B006_62         | HM066672                                                      | Cotton soil <i>Pseudomonas</i> clone 28R14a                        | AF456224     | 97              | 1                  | 0         | 0            | 0                      | 0  |
| EDW07B006_29                    | HM066655             | Wastewater treatment plant <i>Acinetobacter</i> strain HPC253 | AY346313                                                           | 97           | 1               | 0                  | 0         | 0            | 0                      |    |
| EDW07B001_101                   | HM066254             | Deep-sea sediment <i>Stenotrophomonas</i> isolate An27        | AJ551165                                                           | 99           | 0               | 0                  | 0         | 0            | 1                      |    |
| Betaproteobacteria              | EDW07B003_5          | HM066432                                                      | Tar-oil aquifer sediments <i>Hydrogenophilaceae</i> clone D10-09   | EU266782     | 93              | 0                  | 0         | 0            | 2                      | 0  |
|                                 | EDW07B002_72         | HM066377                                                      | Marine sediment clone STU9                                         | EU700151     | 99              | 0                  | 0         | 7            | 0                      | 0  |
|                                 | EDW07B002_57         | HM066366                                                      | Marine sediment STU9                                               | EU700151     | 96              | 0                  | 0         | 1            | 0                      | 0  |
|                                 | EDW07B002_30         | HM066345                                                      | Frasassi cave sulfidic stream clone lka50b                         | EF467590     | 98              | 0                  | 2         | 29           | 0                      | 0  |

| Major Taxonomic Class or Phylum | Representative Clone | Closest Relative                                                               | Accession # | % Similarity | Girl Scout Deep | Girl Scout Shallow | LCRA Deep | LCRA Shallow | Paradise Alley Shallow |
|---------------------------------|----------------------|--------------------------------------------------------------------------------|-------------|--------------|-----------------|--------------------|-----------|--------------|------------------------|
|                                 | EDW07B001_4          | HM066205 Deep-sea sediment <i>Janthinobacterium</i> An8 isolate                | AJ551147    | 99           | 0               | 1                  | 2         | 4            | 6                      |
|                                 | EDW07B002_79         | HM066382 Cleanroom <i>Massilia</i> sp. clone GI8-sp-C19                        | GQ129883    | 99           | 0               | 1                  | 1         | 0            | 0                      |
|                                 | EDW07B005_101        | HM066580 Dune sand <i>Oxalobacteraceae</i> bacterium clone 3                   | EU362132    | 98           | 1               | 4                  | 0         | 0            | 0                      |
|                                 | EDW07B005_74         | HM066573 Soil crust <i>Massilia timonae</i> clone CP183-9                      | AJ871463    | 98           | 0               | 1                  | 0         | 0            | 0                      |
|                                 | EDW07B002_61         | HM066369 EBPR sludge clone SBR1001                                             | AF204252    | 95           | 0               | 0                  | 3         | 0            | 0                      |
|                                 | EDW07B005_18         | HM066544 Anaerobic Fe(III) & Mn(IV) degrader <i>Georgfuchsia toluolica</i>     | EF219370    | 94           | 0               | 3                  | 0         | 0            | 0                      |
|                                 | EDW07B002_120        | HM066404 Microbial fuel cell <i>Azospira</i> clone MFC-B162-F12                | FJ393125    | 93           | 0               | 0                  | 1         | 0            | 0                      |
|                                 | EDW07B001_42         | HM066222 Simazine-degrading clone CDB21                                        | AB194096    | 99           | 4               | 4                  | 0         | 2            | 8                      |
|                                 | EDW07B003_101        | HM066491 Simazine-degrading clone CDB21                                        | AB194096    | 99           | 0               | 0                  | 0         | 2            | 0                      |
|                                 | EDW07B005_122        | HM066591 Hydrogen-oxidizing <i>Burkholderia sordidicola</i> isolate Jm120      | DQ256491    | 99           | 0               | 1                  | 0         | 0            | 0                      |
|                                 | EDW07B001_18         | HM066207 Concrete sewer pipe biofilm 057MICCrown clone                         | JF341695    | 97           | 0               | 0                  | 0         | 0            | 1                      |
|                                 | EDW07B001_70         | HM066234 Tar-oil aquifer sediments <i>Hydrogenophilaceae</i> clone D10_45      | EU266809    | 99           | 0               | 0                  | 0         | 0            | 11                     |
|                                 | EDW07B005_43         | HM066558 Wetland water clone TDNP_Wbc97_166_1_58                               | FJ517027    | 96           | 0               | 2                  | 0         | 0            | 0                      |
|                                 | EDW07B002_118        | HM066402 Wetland water clone TDNP_Wbc97_166_1_58                               | FJ517027    | 95           | 0               | 0                  | 1         | 0            | 0                      |
|                                 | EDW07B002_41         | HM066354 <i>Comamonas</i> sp. L11                                              | EF426453    | 99           | 0               | 3                  | 1         | 0            | 0                      |
|                                 | EDW07B006_13         | HM066646 <i>Delftia</i> sp. LFJ11-1                                            | DQ140182    | 98           | 1               | 0                  | 0         | 0            | 0                      |
|                                 | EDW07B006_108        | HM066701 Activated sludge <i>Acidovorax</i> clone KSP2                         | AB076843    | 98           | 1               | 0                  | 0         | 0            | 0                      |
|                                 | EDW07B005_144        | HM066626 TCE-transforming wastewater clone SJA-62                              | AJ009470    | 99           | 0               | 1                  | 0         | 0            | 0                      |
|                                 | EDW07B001_68         | HM066233 Thiosulfate-oxidizing freshwater <i>Thiobacillus</i> isolate LMD81.11 | AJ289884    | 97           | 0               | 0                  | 0         | 0            | 5                      |
|                                 | EDW07B002_116        | HM066401 Tar-oil aquifer sediment <i>Gallionellaceae</i> clone D12_32          | EU266836    | 94           | 0               | 0                  | 1         | 0            | 0                      |
|                                 | EDW07B002_52         | HM066363 Microbial fuel cell <i>Azospira</i> clone MFC-B162-G10                | FJ393134    | 99           | 0               | 0                  | 5         | 11           | 0                      |
|                                 | EDW07B001_98         | HM066252 Freshwater pond <i>nifH</i> -harboring clone IMCC1716                 | DQ664239    | 95           | 0               | 0                  | 0         | 0            | 1                      |
|                                 | EDW07B001_10         | HM066206 <i>Thiobacillus denitrificans</i> ATCC 25259                          | CP000116    | 99           | 0               | 0                  | 0         | 0            | 2                      |
|                                 | EDW07B001_37         | HM066288 Simazine-degrading clone CDB21                                        | AB194096    | 99           | 1               | 2                  | 0         | 0            | 2                      |
|                                 | EDW07B003_88         | HM066483 Microbial fuel cell clone <i>Azospira</i> MFC-B162-G10                | FJ393134    | 98           | 0               | 0                  | 0         | 1            | 0                      |
|                                 | EDW07B005_165        | HM066635 Anaerobic Fe(III) & Mn(IV) degrader <i>Georgfuchsia toluolica</i>     | EF219370    | 96           | 0               | 1                  | 0         | 0            | 0                      |
|                                 | EDW07B006_42         | HM066661 Dune sand <i>Oxalobacteraceae</i> clone 3                             | EU362132    | 98           | 1               | 0                  | 0         | 0            | 0                      |
|                                 | EDW07B006_127        | HM066710 Antarctic lake sediments <i>Janthinobacterium</i> clone Lc30-2        | GU244361    | 98           | 1               | 0                  | 0         | 0            | 0                      |
|                                 | EDW07B005_93         | HM066613 <i>Comamonas</i> sp. L11                                              | EF426453    | 99           | 0               | 2                  | 0         | 0            | 0                      |
| <i>Deltaproteobacteria</i>      | EDW07B001_39         | HM066220 Marine cold-seep sediments clone GoM140_Bac40                         | AM746084    | 92           | 0               | 0                  | 0         | 0            | 1                      |
|                                 | EDW07B003_98         | HM066490 El Zacaton biomat, 114 m deep, clone 114MB87                          | FJ485074    | 97           | 0               | 0                  | 0         | 1            | 0                      |
|                                 | EDW07B001_121        | HM066266 Wetland water clone TCNP_Wbc97_1_229                                  | FJ517129    | 96           | 0               | 0                  | 0         | 0            | 1                      |
|                                 | EDW07B005_14         | HM066542 Humic lake water clone CrystalBog021E5                                | AY792293    | 90           | 0               | 1                  | 0         | 0            | 0                      |
|                                 | EDW07B001_47         | HM066225 UASB reactor <i>Smithella</i> clone B09                               | EU888819    | 93           | 0               | 0                  | 0         | 0            | 1                      |
|                                 | EDW07B005_72         | HM066571 Deep marine sediments, 2725 m deep, clone II3B                        | FJ205327    | 84           | 0               | 1                  | 0         | 0            | 0                      |
|                                 | EDW07B001_28         | HM066214 El Zacaton biomat, 114 m deep, clone Z17M21B                          | FJ484425    | 87           | 0               | 0                  | 0         | 0            | 2                      |
|                                 | EDW07B005_97         | HM066578 Mangrove soil clone MSB-5D3                                           | DQ811832    | 80           | 0               | 1                  | 0         | 0            | 0                      |
| <i>Bacteroidetes</i>            | EDW07B001_46         | HM066291 Soil enrichment <i>Pedobacter</i> sp. VA-17                           | DQ984208    | 97           | 0               | 0                  | 0         | 0            | 1                      |
|                                 | EDW07B003_51         | HM066518 Soil <i>Pedobacter terrae</i> strain DS-57                            | DQ889723    | 99           | 0               | 0                  | 0         | 1            | 0                      |

| Major Taxonomic Class or Phylum | Representative Clone | Closest Relative                                  | Accession #                                                          | % Similarity | Girl Scout Deep | Girl Scout Shallow | LCRA Deep | LCRA Shallow | Paradise Alley Shallow |     |
|---------------------------------|----------------------|---------------------------------------------------|----------------------------------------------------------------------|--------------|-----------------|--------------------|-----------|--------------|------------------------|-----|
| Nitrospirae                     | EDW07B002_60         | HM066368                                          | Soil <i>Pedobacter agri</i> strain PB92                              | EF660751     | 100             | 0                  | 0         | 3            | 0                      | 0   |
|                                 | EDW07B001_88         | HM066246                                          | Volcanic deposit soil <i>Sphingobacteriaceae</i> clone KVD-1969-11   | DQ490464     | 97              | 0                  | 0         | 0            | 0                      | 1   |
|                                 | EDW07B002_75         | HM066380                                          | Water <i>Flavobacterium</i> isolate ARSA-45                          | GU295966     | 98              | 0                  | 0         | 7            | 0                      | 0   |
|                                 | EDW07B002_34         | HM066413                                          | <i>Cytophaga</i> sp. SA1                                             | AF414444     | 95              | 0                  | 0         | 2            | 0                      | 0   |
|                                 | EDW07B003_39         | HM066513                                          | Paper mill slime <i>Bacteroidetes</i> clone CLi112                   | AF529321     | 98              | 1                  | 0         | 0            | 2                      | 0   |
|                                 | EDW07B002_47         | HM066358                                          | Paper pulp column <i>Bacteroidetes</i> clone CC_04                   | EF562555     | 99              | 0                  | 0         | 1            | 0                      | 0   |
|                                 | EDW07B002_39         | HM066352                                          | Fresh water lake <i>Bacteroidetes</i> clone 1.9.7.2                  | AY887013     | 98              | 0                  | 0         | 1            | 0                      | 0   |
|                                 | EDW07B002_103        | HM066424                                          | Sediment <i>Flavobacterium</i> clone THWCSN34                        | AM888191     | 96              | 0                  | 0         | 1            | 0                      | 0   |
|                                 | EDW07B002_94         | HM066423                                          | Soil <i>Pedobacter agri</i> strain PB92                              | EF660751     | 99              | 0                  | 0         | 1            | 0                      | 0   |
|                                 | EDW07B001_110        | HM066260                                          | Tar-oil aquifer sediment <i>Bacteroidetes/Chlorobi</i> clone D25_47  | EU266920     | 91              | 0                  | 0         | 1            | 0                      | 1   |
|                                 | EDW07B002_36         | HM066349                                          | Marine sediment <i>Bacteroidetes</i> clone ANTXXIII_706-4_Bac44      | FN429794     | 89              | 0                  | 0         | 1            | 0                      | 0   |
|                                 | EDW07B005_121        | HM066590                                          | Mo mine sediment <i>Bacteroidetes/Chlorobi</i> clone 715OD1B27       | EF562135     | 95              | 0                  | 1         | 0            | 0                      | 0   |
|                                 | EDW07B005_23         | HM066548                                          | Cold-seep sediment <i>Cytophaga</i> clone JT75-104                   | AB189358     | 87              | 0                  | 1         | 0            | 0                      | 0   |
|                                 | EDW07B005_118        | HM066588                                          | Tar-oil aquifer sediment <i>Nitrospiraceae</i> clone D15_30          | EU266868     | 98              | 0                  | 3         | 0            | 0                      | 1   |
|                                 | EDW07B005_73         | HM066572                                          | El Zacaton biomat, 17 m deep, clone Z17M50B                          | FJ484454     | 93              | 0                  | 1         | 0            | 0                      | 0   |
|                                 | EDW07B002_112        | HM066400                                          | Wetland water <i>Nitrospirae</i> clone TDNP_Wbc97_10_7_4             | FJ516996     | 95              | 0                  | 0         | 3            | 0                      | 0   |
|                                 | EDW07B003_16         | HM066439                                          | El Zacaton biomat, 17 m deep, clone Z17M13B                          | FJ484418     | 94              | 0                  | 0         | 0            | 1                      | 0   |
|                                 | EDW07B005_16         | HM066543                                          | El Zacaton biomat, 17 m deep, clone Z17M13B                          | FJ484418     | 94              | 0                  | 1         | 0            | 0                      | 0   |
|                                 | EDW07B006_84         | HM066689                                          | El Zacaton biomat, 53 m deep, clone Z53M16B                          | FJ484503     | 97              | 1                  | 0         | 0            | 0                      | 0   |
|                                 | EDW07B002_121        | HM066405                                          | Radioactive waste well water clone S15A-MN131                        | AJ534688     | 87              | 0                  | 0         | 1            | 0                      | 0   |
| EDW07B005_127                   | HM066593             | Wetland water clone TDNP_USbc97_185_1_45          | FJ516912                                                             | 95           | 0               | 1                  | 0         | 0            | 0                      |     |
| EDW07B005_79                    | HM066605             | Deep marine sediment <i>Nitrospira</i> clone II1F | FJ205367                                                             | 94           | 0               | 1                  | 0         | 0            | 0                      |     |
| Firmicutes                      | EDW07B001_27         | HM066283                                          | Subsurface water, South Africa clone DR546BH1103001SAD14             | DQ234641     | 95              | 0                  | 0         | 3            | 0                      | 1   |
| Planctomycetes                  | EDW07B002_19         | HM066339                                          | Nitrate-reducing, deep-sea vent <i>Vulcanibacillus modesticaldus</i> | AM050346     | 95              | 0                  | 0         | 1            | 0                      | 0   |
|                                 | EDW07B002_44         | HM066356                                          | Nitrate-reducing, deep-sea vent <i>Vulcanibacillus modesticaldus</i> | AM050346     | 95              | 0                  | 0         | 1            | 0                      | 0   |
|                                 | EDW07B005_49         | HM066562                                          | Mangrove soil <i>Firmicutes</i> clone MSB-5C10                       | DQ811928     | 86              | 0                  | 1         | 0            | 0                      | 0   |
|                                 | EDW07B001_141        | HM066328                                          | Subsurface water, South Africa clone DR546BH1103001SAD14             | DQ234641     | 95              | 0                  | 0         | 0            | 0                      | 1   |
| Chloroflexi                     | EDW07B005_7          | HM066537                                          | Pristine coastal aquifer <i>Planctomycete</i> clone 49S1_2B_12       | DQ837238     | 89              | 0                  | 1         | 0            | 0                      | 0   |
|                                 | EDW07B005_24         | HM066549                                          | Pristine coastal aquifer <i>Planctomycete</i> clone 49S1_2B_12       | DQ837238     | 97              | 0                  | 1         | 0            | 0                      | 0   |
|                                 | EDW07B002_12         | HM066335                                          | El Zacaton biomat, 195 m deep, clone Z195MB5                         | FJ484765     | 91              | 0                  | 0         | 1            | 0                      | 0   |
|                                 | EDW07B002_28         | HM066343                                          | Wetland water <i>Planctomycetales</i> clone TDNP_Wbc97_134_1_41      | FJ517014     | 90              | 0                  | 0         | 1            | 0                      | 0   |
| Caldithrix                      | EDW07B005_86         | HM066608                                          | Tar-oil aquifer sediment <i>Chloroflexi</i> clone D15_19             | EU266859     | 94              | 0                  | 1         | 0            | 0                      | 0   |
|                                 | EDW07B003_87         | HM066482                                          | Lake Tanganyika anoxic hypolimnion clone TK-SH12                     | DQ463718     | 88              | 0                  | 0         | 0            | 1                      | 0   |
| Candidate Divisions             | EDW07B001_41         | HM066221                                          | Limestone sinkhole <i>Caldithrix</i> clone LP30MUD30                 | FJ901586     | 83              | 0                  | 0         | 0            | 0                      | 2   |
|                                 | EDW07B002_65         | HM066372                                          | Farm soil Candidate Division SPAM clone AKYG1047                     | AY921949     | 92              | 0                  | 0         | 1            | 0                      | 0   |
|                                 | EDW07B005_131        | HM066596                                          | Suboxic freshwater Candidate Division OD1 clone MVP-6A-5             | DQ676467     | 86              | 0                  | 1         | 0            | 0                      | 0   |
|                                 | EDW07B005_52         | HM066599                                          | Glacier soil Candidate Division TM7 clone P1s-267                    | GQ287613     | 92              | 0                  | 1         | 0            | 0                      | 0   |
| Total                           |                      |                                                   |                                                                      |              |                 | 88                 | 108       | 97           | 105                    | 128 |
