# Supplementary material
Source: PubMed Central journal article supplement (PMC3555096)
Supplement: ismej2012105x4.pdf [file ismej2012105x4.pdf]

C.J. Gray and A.S. Engel - “Microbial diversity and impact on carbonate geochemistry across a changing geochemical gradient in a karst aquifer”

### Supplemental Information

**Table S3. Taxonomic diversity based on RDP Classifier analyses. Assignments for the Proteobacteria were done to the genus-level where possible, while all the other major phyla were done to the class-level.**

| Phylum                  | Class                  | Order                    | Family | Genus | Comal Springs | Girl Scout Shallow | Girl Scout Deep | LCRA Shallow | LCRA Deep | Paradise Alley Shallow | Paradise Alley Deep | Aquarena well |
|-------------------------|------------------------|--------------------------|--------|-------|---------------|--------------------|-----------------|--------------|-----------|------------------------|---------------------|---------------|
| <b>Acidobacteria</b>    |                        |                          |        |       | 10            | 7                  | 2               | 6            | 5         | 32                     | 1                   | 1             |
|                         |                        | Acidobacteria Group 1    |        |       | 0             | 0                  | 1               | 0            | 0         | 0                      | 0                   | 0             |
|                         |                        | Acidobacteria Group 2    |        |       | 0             | 1                  | 0               | 0            | 0         | 0                      | 0                   | 0             |
|                         |                        | Acidobacteria Group 3    |        |       | 0             | 0                  | 0               | 0            | 0         | 5                      | 0                   | 0             |
|                         |                        | Acidobacteria Group 4    |        |       | 4             | 0                  | 0               | 1            | 0         | 0                      | 0                   | 0             |
|                         |                        | Acidobacteria Group 6    |        |       | 4             | 0                  | 1               | 1            | 0         | 18                     | 1                   | 0             |
|                         |                        | Acidobacteria Group 15   |        |       | 0             | 1                  | 0               | 0            | 0         | 0                      | 0                   | 0             |
|                         |                        | Acidobacteria Group 16   |        |       | 1             | 0                  | 0               | 0            | 0         | 0                      | 0                   | 0             |
|                         |                        | Acidobacteria Group 17   |        |       | 1             | 0                  | 0               | 0            | 0         | 0                      | 0                   | 0             |
|                         | Acidobacteria Group 18 |                          |        | 0     | 5             | 0                  | 0               | 2            | 0         | 0                      | 0                   |               |
|                         | <i>Holophagae</i>      |                          |        | 0     | 0             | 0                  | 4               | 3            | 9         | 0                      | 1                   |               |
| <b>Actinobacteria</b>   |                        |                          |        |       | 67            | 0                  | 2               | 7            | 1         | 1                      | 0                   | 3             |
|                         |                        | <i>Actinobacteria</i>    |        |       | 67            | 0                  | 2               | 7            | 1         | 1                      | 0                   | 3             |
| <b>Bacteroidetes</b>    |                        |                          |        |       | 240           | 18                 | 7               | 20           | 8         | 16                     | 3                   | 121           |
|                         |                        | <i>Bacteroidia</i>       |        |       | 3             | 0                  | 0               | 0            | 0         | 0                      | 0                   | 100           |
|                         |                        | <i>Flavobacteria</i>     |        |       | 104           | 4                  | 2               | 0            | 0         | 0                      | 0                   | 1             |
|                         |                        | <i>Sphingobacteria</i>   |        |       | 96            | 11                 | 0               | 13           | 7         | 2                      | 0                   | 4             |
|                         |                        | Unclassified             |        |       | 37            | 3                  | 5               | 7            | 1         | 14                     | 3                   | 16            |
| <b>Chloroflexi</b>      |                        |                          |        |       | 4             | 19                 | 30              | 38           | 3         | 293                    | 17                  | 147           |
|                         |                        | <i>Anaerolineae</i>      |        |       | 0             | 16                 | 30              | 24           | 3         | 289                    | 17                  | 144           |
|                         |                        | <i>Caldilineae</i>       |        |       | 4             | 0                  | 0               | 0            | 0         | 2                      | 0                   | 1             |
|                         |                        | <i>Dehalococcoidetes</i> |        |       | 0             | 3                  | 0               | 13           | 0         | 0                      | 0                   | 0             |
|                         |                        | Unclassified             |        |       | 0             | 0                  | 0               | 1            | 0         | 2                      | 0                   | 2             |
| <b>Cyanobacteria</b>    |                        |                          |        |       | 2             | 4                  | 0               | 0            | 0         | 0                      | 0                   |               |
|                         | <i>Cyanobacteria</i>   |                          |        |       | 2             | 4                  | 0               | 0            | 0         | 0                      | 0                   |               |
| <b>Fibrobacteres</b>    |                        |                          |        |       | 1             | 0                  | 0               | 0            | 0         | 0                      | 0                   |               |
|                         | <i>Fibrobacteria</i>   |                          |        |       | 1             | 0                  | 0               | 0            | 0         | 0                      | 0                   |               |
| <b>Firmicutes</b>       |                        |                          |        |       | 1862          | 62                 | 36              | 456          | 659       | 31                     | 2                   | 44            |
|                         |                        | <i>Clostridia</i>        |        |       | 16            | 5                  | 3               | 8            | 1         | 7                      | 0                   | 3             |
|                         |                        | <i>Bacilli</i>           |        |       | 1843          | 51                 | 33              | 440          | 651       | 24                     | 2                   | 41            |
|                         |                        | Unclassified             |        |       | 3             | 6                  | 0               | 8            | 7         | 0                      | 0                   | 0             |
| <b>Fusobacteria</b>     |                        |                          |        |       | 0             | 0                  | 0               | 0            | 0         | 0                      | 1                   |               |
|                         | <i>Fusobacteria</i>    |                          |        |       | 0             | 0                  | 0               | 0            | 0         | 0                      | 1                   |               |
| <b>Gemmatimonadetes</b> |                        |                          |        |       | 1             | 0                  | 0               | 0            | 2         | 3                      | 0                   | 0             |
|                         |                        | <i>Gemmatimonadetes</i>  |        |       | 1             | 0                  | 0               | 0            | 2         | 3                      | 0                   | 0             |

| Phylum                        | Class                               | Order              | Family              | Genus                    | Comal Springs | Girl Scout Shallow | Girl Scout Deep | LCRA Shallow | LCRA Deep | Paradise Alley Shallow | Paradise Alley Deep | Aqurena well |
|-------------------------------|-------------------------------------|--------------------|---------------------|--------------------------|---------------|--------------------|-----------------|--------------|-----------|------------------------|---------------------|--------------|
| <b>Nitrospira</b>             |                                     |                    |                     |                          | 5             | 1                  | 0               | 0            | 1         | 9                      | 0                   | 0            |
|                               | <i>Nitrospira</i>                   |                    |                     |                          | 5             | 1                  | 0               | 0            | 1         | 9                      | 0                   | 0            |
| <b>Planctomycetes</b>         |                                     |                    |                     |                          | 3             | 0                  | 1               | 2            | 1         | 3                      | 0                   | 1            |
|                               | <i>Planctomycetacia</i>             |                    |                     |                          | 3             | 0                  | 1               | 2            | 1         | 3                      | 0                   | 1            |
| <b>Spirochaetes</b>           |                                     |                    |                     |                          | 0             | 1                  | 0               | 0            | 0         | 1                      | 0                   | 1            |
|                               | <i>Spirochaetes</i>                 |                    |                     |                          | 0             | 1                  | 0               | 0            | 0         | 1                      | 0                   | 1            |
| <b>Synergistetes</b>          |                                     |                    |                     |                          | 0             | 0                  | 0               | 0            | 0         | 0                      | 0                   | 2            |
|                               | <i>Synergistia</i>                  |                    |                     |                          | 0             | 0                  | 0               | 0            | 0         | 0                      | 0                   | 2            |
| <b>Thermotogae</b>            |                                     |                    |                     |                          | 0             | 0                  | 0               | 0            | 0         | 0                      | 0                   | 16           |
|                               | <i>Thermotogae</i>                  |                    |                     |                          | 0             | 0                  | 0               | 0            | 0         | 0                      | 0                   | 16           |
| <b>Verrucomicrobia</b>        |                                     |                    |                     |                          | 32            | 0                  | 1               | 0            | 7         | 0                      | 0                   | 0            |
|                               | Subdivision 3                       |                    |                     |                          | 1             | 0                  | 0               | 0            | 5         | 0                      | 0                   | 0            |
|                               | <i>Opitutae</i>                     |                    |                     |                          | 31            | 0                  | 1               | 0            | 0         | 0                      | 0                   | 0            |
|                               | Unclassified                        |                    |                     |                          | 0             | 0                  | 0               | 0            | 2         | 0                      | 0                   | 0            |
| <b>Candidate Division TM7</b> |                                     |                    |                     |                          | 75            | 0                  | 0               | 0            | 0         | 0                      | 0                   | 0            |
| <b>Candidate Division WS3</b> |                                     |                    |                     |                          | 0             | 2                  | 0               | 1            | 0         | 10                     | 0                   | 0            |
| <b>Candidate Division OD1</b> |                                     |                    |                     |                          | 0             | 1                  | 0               | 0            | 0         | 0                      | 0                   | 0            |
| <b>Proteobacteria</b>         |                                     |                    |                     |                          | 1779          | 1583               | 1215            | 798          | 840       | 829                    | 130                 | 2816         |
|                               | <b><i>Epsilonproteobacteria</i></b> |                    |                     |                          | 2             | 4                  | 2               | 0            | 1         | 0                      | 0                   | 214          |
|                               |                                     | Campylobacterales  |                     |                          | 2             | 3                  | 0               | 0            | 1         | 0                      | 0                   | 212          |
|                               |                                     |                    | Campylobacteraceae  |                          | 0             | 3                  | 0               | 0            | 0         | 0                      | 0                   | 139          |
|                               |                                     |                    |                     | <i>Sulfurospirillum</i>  | 0             | 3                  | 0               | 0            | 0         | 0                      | 0                   | 138          |
|                               |                                     |                    | Unclassified        |                          | 0             | 0                  | 0               | 0            | 0         | 0                      | 0                   | 1            |
|                               |                                     |                    | Helicobacteraceae   |                          | 2             | 0                  | 0               | 0            | 1         | 0                      | 0                   | 25           |
|                               |                                     |                    |                     | <i>Sulfurovum</i>        | 0             | 0                  | 0               | 0            | 0         | 0                      | 0                   | 23           |
|                               |                                     |                    |                     | <i>Sulfurimonas</i>      | 0             | 0                  | 0               | 0            | 1         | 0                      | 0                   | 0            |
|                               |                                     |                    | Unclassified        |                          | 2             | 0                  | 0               | 0            | 0         | 0                      | 0                   | 2            |
|                               |                                     | Unclassified       |                     |                          | 0             | 0                  | 0               | 0            | 0         | 0                      | 0                   | 48           |
|                               | Unclassified                        |                    |                     |                          | 0             | 1                  | 2               | 0            | 0         | 0                      | 0                   | 2            |
|                               | <b><i>Deltaproteobacteria</i></b>   |                    |                     |                          | 58            | 164                | 123             | 161          | 86        | 306                    | 30                  | 444          |
|                               |                                     | Desulfarculales    |                     |                          | 0             | 2                  | 0               | 13           | 0         | 3                      | 9                   | 2            |
|                               |                                     |                    | Desulfarculaceae    |                          | 0             | 2                  | 0               | 13           | 0         | 3                      | 9                   | 2            |
|                               |                                     |                    |                     | <i>Desulfarculus</i>     | 0             | 2                  | 0               | 13           | 0         | 3                      | 9                   | 2            |
|                               |                                     | Desulfovibrionales |                     |                          | 2             | 1                  | 23              | 1            | 17        | 6                      | 0                   | 171          |
|                               |                                     |                    | Desulfovibrionaceae |                          | 2             | 1                  | 23              | 1            | 17        | 6                      | 0                   | 166          |
|                               |                                     |                    |                     | <i>Desulfovibrio</i>     | 2             | 1                  | 17              | 1            | 16        | 5                      | 0                   | 158          |
|                               |                                     |                    | Unclassified        |                          | 0             | 0                  | 6               | 0            | 1         | 1                      | 0                   | 8            |
|                               |                                     | Unclassified       |                     |                          | 0             | 0                  | 0               | 0            | 0         | 0                      | 0                   | 5            |
|                               |                                     | Desulfobacterales  |                     |                          | 1             | 0                  | 29              | 0            | 26        | 204                    | 14                  | 15           |
|                               |                                     |                    | Desulfobulbaceae    |                          | 0             | 0                  | 1               | 0            | 10        | 2                      | 2                   | 0            |
|                               |                                     |                    |                     | <i>Desulfurivibrio</i>   | 0             | 0                  | 0               | 0            | 1         | 0                      | 1                   | 0            |
|                               |                                     |                    | Unclassified        |                          | 0             | 0                  | 1               | 0            | 9         | 2                      | 1                   | 0            |
|                               |                                     |                    | Desulfobacteraceae  |                          | 1             | 0                  | 24              | 0            | 1         | 175                    | 10                  | 14           |
|                               |                                     |                    |                     | <i>Desulfatirhabdium</i> | 0             | 0                  | 10              | 0            | 0         | 4                      | 0                   | 0            |
|                               |                                     |                    |                     | <i>Desulfonema</i>       | 0             | 0                  | 0               | 0            | 0         | 1                      | 0                   | 8            |
|                               |                                     |                    |                     | <i>Desulfatirhabdium</i> | 0             | 0                  | 0               | 0            | 0         | 9                      | 0                   | 0            |

| Phylum | Class        | Order                       | Family               | Genus                    | Comal Springs | Girl Scout Shallow | Girl Scout Deep | LCRA Shallow | LCRA Deep | Paradise Alley Shallow | Paradise Alley Deep | Aquarena well |
|--------|--------------|-----------------------------|----------------------|--------------------------|---------------|--------------------|-----------------|--------------|-----------|------------------------|---------------------|---------------|
|        |              |                             |                      | <i>Desulfatiferula</i>   | 0             | 0                  | 0               | 0            | 0         | 2                      | 0                   | 0             |
|        |              |                             |                      | <i>Desulfobotulus</i>    | 0             | 0                  | 0               | 0            | 0         | 0                      | 0                   | 1             |
|        |              | Desulfuromonadales          | Unclassified         |                          | 1             | 0                  | 14              | 0            | 1         | 159                    | 10                  | 5             |
|        |              |                             | Geobacteraceae       |                          | 1             | 0                  | 6               | 0            | 0         | 0                      | 0                   | 0             |
|        |              |                             |                      | <i>Geobacter</i>         | 1             | 0                  | 6               | 0            | 0         | 0                      | 0                   | 0             |
|        |              | Myxococcales                |                      |                          | 46            | 0                  | 1               | 4            | 0         | 2                      | 0                   | 2             |
|        |              | Cystobacterineae (suborder) |                      |                          | 4             | 0                  | 1               | 2            | 0         | 1                      | 0                   | 0             |
|        |              |                             | Cystobacteraceae     |                          | 4             | 0                  | 1               | 2            | 0         | 1                      | 0                   | 0             |
|        |              |                             | Unclassified         | <i>Hyalangium</i>        | 1             | 0                  | 0               | 0            | 0         | 0                      | 0                   | 0             |
|        |              | Unclassified                |                      |                          | 3             | 0                  | 0               | 0            | 0         | 0                      | 0                   | 0             |
|        |              | Nannocystineae (suborder)   |                      |                          | 1             | 0                  | 0               | 0            | 0         | 0                      | 0                   | 0             |
|        |              |                             |                      |                          | 4             | 0                  | 0               | 0            | 0         | 0                      | 0                   | 0             |
|        |              |                             | Kofleriaceae         |                          | 1             | 0                  | 0               | 0            | 0         | 0                      | 0                   | 0             |
|        |              |                             |                      | <i>Kofleria</i>          | 1             | 0                  | 0               | 0            | 0         | 0                      | 0                   | 0             |
|        |              |                             | Nannocystaceae       |                          | 1             | 0                  | 0               | 0            | 0         | 0                      | 0                   | 0             |
|        |              |                             |                      | <i>Nannocystis</i>       | 1             | 0                  | 0               | 0            | 0         | 0                      | 0                   | 0             |
|        |              | Unclassified                |                      |                          | 2             | 0                  | 0               | 0            | 0         | 0                      | 0                   | 0             |
|        |              | Sorangiiineae (suborder)    |                      |                          | 4             | 0                  | 0               | 1            | 0         | 1                      | 0                   | 0             |
|        |              |                             | Polyangiaceae        |                          | 3             | 0                  | 0               | 1            | 0         | 1                      | 0                   | 0             |
|        |              |                             | Unclassified         |                          | 3             | 0                  | 0               | 0            | 0         | 0                      | 0                   | 0             |
|        |              | Unclassified                |                      |                          | 1             | 0                  | 0               | 0            | 0         | 0                      | 0                   | 0             |
|        |              | Sorangiiineae               |                      |                          |               |                    |                 |              |           |                        |                     |               |
|        |              | Unclassified                |                      |                          | 33            | 0                  | 0               | 1            | 0         | 0                      | 0                   | 2             |
|        |              | Myxococcales                |                      |                          |               |                    |                 |              |           |                        |                     |               |
|        |              | Syntrophobacterales         |                      |                          | 0             | 9                  | 11              | 14           | 2         | 12                     | 2                   | 44            |
|        |              |                             | Syntrophobacteraceae |                          | 0             | 0                  | 0               | 1            | 1         | 0                      | 0                   | 2             |
|        |              |                             | Unclassified         |                          | 0             | 0                  | 0               | 1            | 1         | 0                      | 0                   | 2             |
|        |              |                             | Syntrophaceae        |                          | 0             | 8                  | 9               | 13           | 0         | 12                     | 2                   | 42            |
|        |              |                             |                      | <i>Desulfomonile</i>     | 0             | 3                  | 5               | 6            | 0         | 6                      | 2                   | 9             |
|        |              |                             |                      | <i>Syntrophus</i>        | 0             | 1                  | 2               | 0            | 0         | 2                      | 0                   | 0             |
|        |              |                             |                      | <i>Desulfobacca</i>      | 0             | 3                  | 2               | 0            | 0         | 1                      | 0                   | 32            |
|        |              |                             | Unclassified         |                          | 0             | 1                  | 0               | 7            | 0         | 3                      | 0                   | 1             |
|        |              | Unclassified                |                      |                          | 0             | 1                  | 2               | 0            | 1         | 0                      | 0                   | 0             |
|        |              | Desulfobacterales           |                      |                          | 0             | 44                 | 0               | 48           | 0         | 0                      | 0                   | 0             |
|        |              |                             | Desulfobulbaceae     |                          | 0             | 24                 | 0               | 20           | 0         | 0                      | 0                   | 0             |
|        |              |                             |                      | <i>Desulfurivibrio</i>   | 0             | 19                 | 0               | 2            | 0         | 0                      | 0                   | 0             |
|        |              |                             | Unclassified         |                          | 0             | 5                  | 0               | 18           | 0         | 0                      | 0                   | 0             |
|        |              |                             | Desulfobacteraceae   |                          | 0             | 4                  | 0               | 21           | 0         | 0                      | 0                   | 0             |
|        |              |                             |                      | <i>Desulfatirhabdium</i> | 0             | 0                  | 0               | 3            | 0         | 0                      | 0                   | 0             |
|        |              |                             | Unclassified         |                          | 0             | 4                  | 0               | 18           | 0         | 0                      | 0                   | 0             |
|        |              | Unclassified                |                      |                          | 0             | 16                 | 4               | 7            | 15        | 27                     | 2                   | 1             |
|        | Unclassified |                             |                      |                          | 8             | 108                | 53              | 81           | 41        | 79                     | 5                   | 210           |

| Phylum | Class                     | Order             | Family                         | Genus                    | Comal Springs | Girl Scout Shallow | Girl Scout Deep | LCRA Shallow | LCRA Deep | Paradise Alley Shallow | Paradise Alley Deep | Aquarena well |
|--------|---------------------------|-------------------|--------------------------------|--------------------------|---------------|--------------------|-----------------|--------------|-----------|------------------------|---------------------|---------------|
|        | <i>Betaproteobacteria</i> |                   |                                |                          | 918           | 1275               | 871             | 395          | 641       | 173                    | 17                  | 48            |
|        |                           | Hydrogenophilales |                                |                          | 1             | 11                 | 12              | 4            | 1         | 76                     | 3                   | 2             |
|        |                           |                   | Hydrogenophilaceae             |                          | 1             | 11                 | 12              | 4            | 1         | 76                     | 3                   | 2             |
|        |                           |                   |                                | <i>Thiobacillus</i>      | 1             | 11                 | 12              | 4            | 1         | 76                     | 3                   | 2             |
|        |                           | Methylophilales   |                                |                          | 11            | 0                  | 1               | 0            | 0         | 0                      | 0                   | 0             |
|        |                           |                   | Methylophilaceae               |                          | 11            | 0                  | 1               | 0            | 0         | 0                      | 0                   | 0             |
|        |                           |                   |                                | <i>Methylobacillus</i>   | 1             | 0                  | 0               | 0            | 0         | 0                      | 0                   | 0             |
|        |                           |                   |                                | <i>Methylophilus</i>     | 7             | 0                  | 1               | 0            | 0         | 0                      | 0                   | 0             |
|        |                           |                   | Unclassified                   |                          | 3             | 0                  | 0               | 0            | 0         | 0                      | 0                   | 0             |
|        |                           | Neisseriales      |                                |                          | 2             | 1                  | 0               | 4            | 0         | 0                      | 0                   | 0             |
|        |                           |                   | Neisseriaceae                  |                          | 2             | 1                  | 6               | 4            | 0         | 0                      | 0                   | 0             |
|        |                           |                   |                                | <i>Deefgea</i>           | 1             | 0                  | 0               | 0            | 0         | 0                      | 0                   | 0             |
|        |                           |                   |                                | <i>Vogesella</i>         | 0             | 1                  | 6               | 4            | 0         | 0                      | 0                   | 0             |
|        |                           |                   | Unclassified                   |                          | 1             | 0                  | 0               | 0            | 0         | 0                      | 0                   | 0             |
|        |                           | Rhodocyclales     |                                |                          | 8             | 78                 | 81              | 119          | 138       | 3                      | 0                   | 0             |
|        |                           |                   | Rhodocyclaceae                 |                          | 8             | 78                 | 81              | 119          | 138       | 3                      | 0                   | 0             |
|        |                           |                   |                                | <i>Azoarcus</i>          | 0             | 1                  | 0               | 1            | 0         | 0                      | 0                   | 0             |
|        |                           |                   |                                | <i>Dechloromonas</i>     | 1             | 0                  | 0               | 0            | 0         | 0                      | 0                   | 0             |
|        |                           |                   |                                | <i>Methyloversatilis</i> | 0             | 2                  | 4               | 4            | 1         | 0                      | 0                   | 0             |
|        |                           |                   |                                | <i>Shinella</i>          | 1             | 0                  | 0               | 0            | 0         | 0                      | 0                   | 0             |
|        |                           |                   |                                | <i>Propionivibrio</i>    | 5             | 0                  | 0               | 4            | 0         | 0                      | 0                   | 0             |
|        |                           |                   |                                | <i>Zoogloea</i>          | 0             | 37                 | 45              | 25           | 5         | 1                      | 0                   | 0             |
|        |                           |                   | Unclassified                   |                          | 1             | 38                 | 32              | 85           | 132       | 2                      | 0                   | 0             |
|        |                           | Burkholderiales   |                                |                          | 756           | 78                 | 57              | 68           | 43        | 50                     | 2                   | 45            |
|        |                           |                   | Oxalobacteraceae               |                          | 332           | 15                 | 15              | 12           | 21        | 1                      | 0                   | 1             |
|        |                           |                   |                                | <i>Duganella</i>         | 1             | 0                  | 0               | 0            | 0         | 0                      | 0                   | 0             |
|        |                           |                   |                                | <i>Herbaspirillum</i>    | 1             | 0                  | 3               | 0            | 0         | 0                      | 0                   | 0             |
|        |                           |                   |                                | <i>Naxibacter</i>        | 71            | 1                  | 0               | 2            | 7         | 0                      | 0                   | 1             |
|        |                           |                   |                                | <i>Massilia</i>          | 157           | 12                 | 6               | 8            | 9         | 0                      | 0                   | 0             |
|        |                           |                   | Unclassified                   |                          | 102           | 2                  | 6               | 2            | 5         | 1                      | 0                   | 0             |
|        |                           |                   | Alcaligenaceae                 |                          | 5             | 0                  | 0               | 0            | 0         | 0                      | 0                   | 0             |
|        |                           |                   |                                | <i>Azohydromonas</i>     | 5             | 0                  | 0               | 0            | 0         | 0                      | 0                   | 0             |
|        |                           |                   | Burkholderiales incertae sedis |                          | 117           | 3                  | 19              | 7            | 6         | 0                      | 0                   | 36            |
|        |                           |                   |                                | <i>Inhella</i>           | 3             | 0                  | 0               | 0            | 0         | 0                      | 0                   | 0             |
|        |                           |                   |                                | <i>Aquincola</i>         | 1             | 0                  | 0               | 0            | 0         | 0                      | 0                   | 0             |
|        |                           |                   |                                | <i>Rhizobacter</i>       | 1             | 0                  | 0               | 0            | 0         | 0                      | 0                   | 0             |
|        |                           |                   |                                | <i>Ideonella</i>         | 9             | 0                  | 0               | 0            | 0         | 0                      | 0                   | 0             |
|        |                           |                   |                                | <i>Xylophilus</i>        | 1             | 0                  | 0               | 0            | 0         | 0                      | 0                   | 0             |
|        |                           |                   |                                | <i>Aquabacterium</i>     | 7             | 2                  | 1               | 0            | 1         | 0                      | 0                   | 1             |
|        |                           |                   |                                | <i>Methylbium</i>        | 18            | 0                  | 1               | 0            | 0         | 0                      | 0                   | 0             |
|        |                           |                   |                                | <i>Mitsuaria</i>         | 27            | 0                  | 2               | 0            | 0         | 0                      | 0                   | 1             |
|        |                           |                   |                                | <i>Thiobacter</i>        | 0             | 0                  | 0               | 5            | 0         | 0                      | 0                   | 0             |
|        |                           |                   |                                | <i>Thiomonas</i>         | 0             | 0                  | 0               | 0            | 2         | 0                      | 0                   | 32            |
|        |                           |                   | Unclassified                   |                          | 50            | 1                  | 12              | 2            | 3         | 0                      | 0                   | 2             |
|        |                           |                   | Burkholderiaceae               |                          | 23            | 4                  | 4               | 0            | 5         | 0                      | 0                   | 0             |



| Phylum | Class                      | Order             | Family             | Genus                       | Comal Springs | Girl Scout Shallow | Girl Scout Deep | LCRA Shallow | LCRA Deep | Paradise Alley Shallow | Paradise Alley Deep | Aqarena well |
|--------|----------------------------|-------------------|--------------------|-----------------------------|---------------|--------------------|-----------------|--------------|-----------|------------------------|---------------------|--------------|
|        |                            |                   |                    | <i>Thioalkalibacter</i>     | 0             | 0                  | 0               | 0            | 0         | 0                      | 0                   | 2            |
|        |                            |                   | Unclassified       |                             | 0             | 0                  | 0               | 0            | 0         | 0                      | 0                   | 1673         |
|        |                            |                   | Chromatiaceae      |                             | 16            | 5                  | 16              | 4            | 1         | 1                      | 0                   | 1            |
|        |                            |                   |                    | <i>Rheinheimera</i>         | 16            | 5                  | 16              | 4            | 0         | 1                      | 0                   | 1            |
|        |                            |                   | Unclassified       |                             | 0             | 0                  | 0               | 0            | 1         | 0                      | 0                   | 5            |
|        |                            | Unclassified      |                    |                             | 3             | 1                  | 1               | 1            | 0         | 0                      | 0                   | 0            |
|        |                            | Enterobacteriales |                    |                             | 62            | 2                  | 0               | 3            | 0         | 0                      | 0                   | 1            |
|        |                            |                   | Enterobacteriaceae |                             | 62            | 2                  | 0               | 3            | 0         | 0                      | 0                   | 1            |
|        |                            |                   |                    | <i>Raoultella</i>           | 4             | 0                  | 0               | 0            | 0         | 0                      | 0                   | 0            |
|        |                            |                   |                    | <i>Erwinia</i>              | 1             | 0                  | 0               | 0            | 0         | 0                      | 0                   | 0            |
|        |                            |                   |                    | <i>Pantoea</i>              | 2             | 0                  | 0               | 0            | 0         | 0                      | 0                   | 0            |
|        |                            |                   |                    | <i>Klebsiella</i>           | 1             | 0                  | 0               | 0            | 0         | 0                      | 0                   | 0            |
|        |                            |                   |                    | <i>Enterobacter</i>         | 2             | 1                  | 0               | 0            | 0         | 0                      | 0                   | 0            |
|        |                            |                   |                    | <i>Escherichia/Shigella</i> | 0             | 1                  | 0               | 0            | 0         | 0                      | 0                   | 0            |
|        |                            |                   | Unclassified       |                             | 52            | 0                  | 0               | 3            | 0         | 0                      | 0                   | 1            |
|        |                            | Xanthomonadales   |                    |                             | 52            | 1                  | 2               | 2            | 1         | 3                      | 0                   | 0            |
|        |                            |                   | Xanthomonadaceae   |                             | 38            | 1                  | 0               | 2            | 1         | 3                      | 0                   | 0            |
|        |                            |                   |                    | <i>Thermomonas</i>          | 1             | 0                  | 0               | 0            | 0         | 0                      | 0                   | 0            |
|        |                            |                   |                    | <i>Pseudoxanthomonas</i>    | 3             | 0                  | 0               | 0            | 0         | 0                      | 0                   | 0            |
|        |                            |                   |                    | <i>Stenotrophomonas</i>     | 6             | 0                  | 0               | 0            | 0         | 3                      | 0                   | 0            |
|        |                            |                   |                    | <i>Arenimonas</i>           | 2             | 0                  | 0               | 0            | 0         | 0                      | 0                   | 0            |
|        |                            |                   |                    | <i>Lysobacter</i>           | 6             | 0                  | 0               | 0            | 0         | 0                      | 0                   | 0            |
|        |                            |                   |                    | <i>Luteimonas</i>           | 3             | 0                  | 0               | 0            | 0         | 0                      | 0                   | 0            |
|        |                            |                   | Unclassified       |                             | 17            | 1                  | 0               | 2            | 1         | 0                      | 0                   | 0            |
|        |                            |                   | Sinobacteraceae    |                             | 14            | 0                  | 2               | 0            | 0         | 0                      | 0                   | 0            |
|        |                            |                   |                    | <i>Singularimonas</i>       | 1             | 0                  | 0               | 0            | 0         | 0                      | 0                   | 0            |
|        |                            |                   |                    | <i>Steroidobacter</i>       | 13            | 0                  | 2               | 0            | 0         | 0                      | 0                   | 0            |
|        |                            | Pseudomonadales   |                    |                             | 158           | 63                 | 158             | 80           | 47        | 4                      | 0                   | 3            |
|        |                            |                   | Moraxellaceae      |                             | 17            | 27                 | 29              | 28           | 14        | 1                      | 0                   | 0            |
|        |                            |                   |                    | <i>Perlucidibaca</i>        | 8             | 0                  | 0               | 0            | 0         | 0                      | 0                   | 0            |
|        |                            |                   |                    | <i>Acinetobacter</i>        | 9             | 26                 | 28              | 27           | 14        | 1                      | 0                   | 0            |
|        |                            |                   | Unclassified       |                             | 0             | 1                  | 1               | 1            | 0         | 0                      | 0                   | 0            |
|        |                            |                   | Pseudomonadaceae   |                             | 140           | 35                 | 126             | 52           | 33        | 3                      | 0                   | 3            |
|        |                            |                   |                    | <i>Azomonas</i>             | 0             | 3                  | 0               | 0            | 0         | 0                      | 0                   | 0            |
|        |                            |                   |                    | <i>Cellvibrio</i>           | 19            | 1                  | 1               | 0            | 0         | 0                      | 0                   | 0            |
|        |                            |                   |                    | <i>Pseudomonas</i>          | 105           | 26                 | 112             | 45           | 28        | 3                      | 0                   | 2            |
|        |                            |                   | Unclassified       |                             | 16            | 5                  | 13              | 7            | 5         | 0                      | 0                   | 1            |
|        |                            | Unclassified      |                    |                             | 1             | 1                  | 3               | 0            | 0         | 0                      | 0                   | 0            |
|        | Unclassified               |                   |                    |                             | 96            | 4                  | 3               | 19           | 10        | 10                     | 0                   | 62           |
|        | <i>Alphaproteobacteria</i> |                   |                    |                             | 271           | 23                 | 30              | 114          | 12        | 198                    | 81                  | 4            |
|        |                            | Rhodobacterales   |                    |                             | 3             | 0                  | 1               | 1            | 0         | 0                      | 1                   | 0            |
|        |                            |                   | Rhodobacteraceae   |                             | 3             | 0                  | 1               | 1            | 0         | 0                      | 1                   | 0            |
|        |                            |                   |                    | <i>Paracoccus</i>           | 2             | 0                  | 0               | 0            | 0         | 0                      | 0                   | 0            |
|        |                            |                   |                    | <i>Rhodobacter</i>          | 0             | 0                  | 1               | 0            | 0         | 0                      | 0                   | 0            |
|        |                            |                   |                    | <i>Rubellimicrobium</i>     | 0             | 0                  | 0               | 1            | 0         | 0                      | 0                   | 0            |
|        |                            |                   | Unclassified       |                             | 1             | 0                  | 0               | 0            | 0         | 0                      | 1                   | 0            |

| Phylum | Class | Order            | Family              | Genus                   | Comal Springs | Girl Scout Shallow | Girl Scout Deep | LCRA Shallow | LCRA Deep | Paradise Alley Shallow | Paradise Alley Deep | Aquena well |
|--------|-------|------------------|---------------------|-------------------------|---------------|--------------------|-----------------|--------------|-----------|------------------------|---------------------|-------------|
|        |       | Caulobacterales  |                     |                         | 15            | 2                  | 3               | 2            | 3         | 6                      | 1                   | 2           |
|        |       |                  | Caulobacteraceae    |                         | 15            | 2                  | 3               | 2            | 3         | 6                      | 1                   | 2           |
|        |       |                  |                     | <i>Brevundimonas</i>    | 3             | 1                  | 2               | 2            | 2         | 1                      | 1                   | 0           |
|        |       |                  |                     | <i>Caulobacter</i>      | 8             | 0                  | 0               | 0            | 1         | 0                      | 0                   | 0           |
|        |       |                  |                     | <i>Phenylobacterium</i> | 0             | 1                  | 1               | 0            | 0         | 3                      | 0                   | 2           |
|        |       |                  | Unclassified        |                         | 4             | 0                  | 0               | 0            | 0         | 2                      | 0                   | 0           |
|        |       | Rhodospirillales |                     |                         | 32            | 3                  | 0               | 61           | 0         | 241                    | 78                  | 2           |
|        |       |                  | Acetobacteraceae    |                         | 4             | 0                  | 0               | 0            | 0         | 0                      | 0                   | 0           |
|        |       |                  |                     | <i>Roseomonas</i>       | 1             | 0                  | 0               | 0            | 0         | 0                      | 0                   | 0           |
|        |       |                  |                     | <i>Rhodopila</i>        | 1             | 0                  | 0               | 0            | 0         | 0                      | 0                   | 0           |
|        |       |                  | Unclassified        |                         | 2             | 0                  | 0               | 0            | 0         | 0                      | 0                   | 0           |
|        |       |                  | Rhodospirillaceae   |                         | 26            | 2                  | 0               | 61           | 0         | 241                    | 78                  | 2           |
|        |       |                  |                     | <i>Azospirillum</i>     | 5             | 0                  | 0               | 0            | 0         | 0                      | 0                   | 0           |
|        |       |                  |                     | <i>Inquilinus</i>       | 18            | 0                  | 0               | 0            | 0         | 0                      | 0                   | 0           |
|        |       |                  |                     | <i>Phaeospirillum</i>   | 0             | 1                  | 0               | 0            | 0         | 0                      | 0                   | 0           |
|        |       |                  |                     | <i>Skermanella</i>      | 0             | 0                  | 0               | 1            | 0         | 0                      | 0                   | 0           |
|        |       |                  |                     | <i>Magnetospirillum</i> | 0             | 0                  | 0               | 60           | 0         | 237                    | 78                  | 2           |
|        |       |                  | Unclassified        |                         | 3             | 1                  | 0               | 0            | 0         | 4                      | 0                   | 0           |
|        |       | Unclassified     |                     |                         | 2             | 1                  | 0               | 0            | 0         | 0                      | 0                   | 0           |
|        |       | Sphingomonadales |                     |                         | 68            | 4                  | 13              | 5            | 3         | 5                      | 0                   | 0           |
|        |       |                  | Sphingomonadaceae   |                         | 66            | 4                  | 12              | 5            | 3         | 4                      | 0                   | 0           |
|        |       |                  |                     | <i>Sphingopyxis</i>     | 1             | 0                  | 0               | 0            | 0         | 0                      | 0                   | 0           |
|        |       |                  |                     | <i>Sphingomonas</i>     | 7             | 1                  | 0               | 1            | 2         | 1                      | 0                   | 0           |
|        |       |                  |                     | <i>Novosphingobium</i>  | 7             | 1                  | 10              | 0            | 1         | 0                      | 0                   | 0           |
|        |       |                  |                     | <i>Sphingobium</i>      | 36            | 2                  | 0               | 0            | 0         | 1                      | 0                   | 0           |
|        |       |                  | Unclassified        |                         | 15            | 0                  | 2               | 4            | 0         | 2                      | 0                   | 0           |
|        |       | Unclassified     |                     |                         | 2             | 12                 | 1               | 0            | 0         | 1                      | 0                   | 0           |
|        |       | Rhizobiales      |                     |                         | 91            | 0                  | 13              | 34           | 5         | 33                     | 0                   | 0           |
|        |       |                  | Xanthobacteraceae   |                         | 1             | 2                  | 0               | 0            | 0         | 0                      | 0                   | 0           |
|        |       |                  |                     | <i>Starkeya</i>         | 1             | 0                  | 0               | 0            | 0         | 0                      | 0                   | 0           |
|        |       |                  | Unclassified        |                         | 0             | 2                  | 0               | 0            | 0         | 0                      | 0                   | 0           |
|        |       |                  | Methylobacteriaceae |                         | 2             | 0                  | 6               | 1            | 1         | 0                      | 0                   | 0           |
|        |       |                  |                     | <i>Methylobacterium</i> | 2             | 0                  | 6               | 1            | 1         | 0                      | 0                   | 0           |
|        |       |                  | Methylocystaceae    |                         | 0             | 0                  | 0               | 2            | 0         | 0                      | 0                   | 0           |
|        |       |                  |                     | <i>Methylocystis</i>    | 0             | 0                  | 0               | 2            | 0         | 0                      | 0                   | 0           |
|        |       |                  | Phyllobacteriaceae  |                         | 5             | 0                  | 0               | 0            | 0         | 0                      | 0                   | 0           |
|        |       |                  |                     | <i>Phyllobacterium</i>  | 2             | 0                  | 0               | 0            | 0         | 0                      | 0                   | 0           |
|        |       |                  |                     | <i>Pseudaminobacter</i> | 1             | 0                  | 0               | 0            | 0         | 0                      | 0                   | 0           |
|        |       |                  | Unclassified        |                         | 2             | 0                  | 0               | 0            | 0         | 0                      | 0                   | 0           |
|        |       |                  | Hyphomicrobiaceae   |                         | 3             | 2                  | 0               | 21           | 0         | 18                     | 0                   | 0           |
|        |       |                  |                     | <i>Devosia</i>          | 2             | 0                  | 0               | 0            | 0         | 0                      | 0                   | 0           |
|        |       |                  |                     | <i>Hyphomicrobium</i>   | 0             | 0                  | 0               | 19           | 0         | 14                     | 0                   | 0           |
|        |       |                  |                     | <i>Rhodoplanes</i>      | 0             | 1                  | 0               | 0            | 0         | 0                      | 0                   | 0           |
|        |       |                  | Unclassified        |                         | 1             | 1                  | 0               | 2            | 0         | 4                      | 0                   | 0           |
|        |       |                  | Rhizobiaceae        |                         | 18            | 3                  | 0               | 0            | 2         | 0                      | 0                   | 0           |
|        |       |                  |                     | <i>Ensifer</i>          | 5             | 0                  | 0               | 0            | 0         | 0                      | 0                   | 0           |

| Phylum                | Class        | Order        | Family            | Genus                 | Comal Springs | Girl Scout Shallow | Girl Scout Deep | LCRA Shallow | LCRA Deep | Paradise Alley Shallow | Paradise Alley Deep | Aqurena well |
|-----------------------|--------------|--------------|-------------------|-----------------------|---------------|--------------------|-----------------|--------------|-----------|------------------------|---------------------|--------------|
|                       |              |              |                   | <i>Rhizobium</i>      | 9             | 3                  | 0               | 0            | 2         | 0                      | 0                   | 0            |
|                       |              |              | Unclassified      |                       | 4             | 0                  | 0               | 0            | 0         | 0                      | 0                   | 0            |
|                       |              |              | Bradyrhizobiaceae |                       | 21            | 1                  | 0               | 4            | 1         | 4                      | 0                   | 0            |
|                       |              |              |                   | <i>Bradyrhizobium</i> | 4             | 1                  | 0               | 1            | 0         | 3                      | 0                   | 0            |
|                       |              |              |                   | <i>Bosea</i>          | 1             | 0                  | 0               | 0            | 1         | 0                      | 0                   | 0            |
|                       |              |              |                   | <i>Balneimonas</i>    | 4             | 0                  | 0               | 2            | 0         | 0                      | 0                   | 0            |
|                       |              |              |                   | <i>Nitrobacter</i>    | 3             | 0                  | 0               | 0            | 0         | 0                      | 0                   | 0            |
|                       |              |              |                   | <i>Agromonas</i>      | 1             | 0                  | 0               | 0            | 0         | 0                      | 0                   | 0            |
|                       |              |              | Unclassified      |                       | 8             | 0                  | 0               | 1            | 0         | 1                      | 0                   | 0            |
|                       |              | Unclassified |                   |                       | 41            | 4                  | 7               | 6            | 1         | 11                     | 0                   | 0            |
|                       | Unclassified |              |                   |                       | 62            | 2                  | 0               | 11           | 1         | 13                     | 1                   | 0            |
| Unclassified          |              |              |                   |                       | 105           | 34                 | 6               | 17           | 40        | 38                     | 0                   | 93           |
| Domain Bacteria       |              |              |                   |                       | 4332          | 2190               | 2367            | 2107         | 1934      | 1948                   | 186                 | 3391         |
| Unclassified Bacteria |              |              |                   |                       | 251           | 492                | 1073            | 784          | 407       | 720                    | 33                  | 238          |
| Unclassified Root     |              |              |                   |                       | 1             | 2                  | 0               | 4            | 3         | 0                      | 0                   | 0            |
