# Supplementary material
Source: PubMed Central journal article supplement (PMC3555096)
Supplement: ismej2012105x5.pdf [file ismej2012105x5.pdf]

## Supplementary Information

**Table S4.** Average mass loss (mg) for calcite and dolomite chips in reactive and sterile *in situ* microcosms. The results from at least ~11 chips for reactive microcosms and ~6 chips for sterile microcosms were averaged per analysis.

| Well                          | Calcite                       |                   |                                                   | Dolomite                      |                   |                                                   |
|-------------------------------|-------------------------------|-------------------|---------------------------------------------------|-------------------------------|-------------------|---------------------------------------------------|
|                               | Avg. mass change <sup>1</sup> | Avg. percent loss | Pre- and post-weight <i>P</i> values <sup>2</sup> | Avg. mass change <sup>1</sup> | Avg. percent loss | Pre- and Post-weight <i>P</i> values <sup>2</sup> |
| <b>Girl Scout Deep</b>        |                               |                   |                                                   |                               |                   |                                                   |
| Sterile                       | -8.93                         | 0.28              | 0.01                                              | -46.13                        | 1.62              | 0.01                                              |
| Reactive                      | -6.13                         | 0.13              | 0.01                                              | -12.63                        | 0.30              | 0.01                                              |
| Reactive                      | -66.77                        | 0.99              | 0.01                                              | -6.50                         | 0.13              | 0.02                                              |
| <b>Girl Scout Shallow</b>     |                               |                   |                                                   |                               |                   |                                                   |
| Sterile                       | -4.40                         | 0.20              | 0.05                                              | +0.50                         | 0.02              | 0.89                                              |
| Reactive                      | -450.67                       | 4.93              | 0.01                                              | -50.90                        | 1.12              | 0.01                                              |
| Reactive                      | -13.53                        | 0.27              | 0.01                                              | -15.73                        | 0.32              | 0.01                                              |
| <b>LCRA Deep</b>              |                               |                   |                                                   |                               |                   |                                                   |
| Sterile                       | -9.13                         | 0.33              | 0.06                                              | -1.27                         | 0.04              | 0.59                                              |
| Reactive                      | -49.23                        | 0.57              | 0.01                                              | -4.73                         | 0.12              | 0.04                                              |
| Reactive                      | -30.90                        | 0.43              | 0.01                                              | -4.83                         | 0.10              | 0.33                                              |
| <b>LCRA Shallow</b>           |                               |                   |                                                   |                               |                   |                                                   |
| Sterile                       | -1.13                         | 0.05              | 0.24                                              | +1.87                         | 0.07              | 0.62                                              |
| Reactive                      | -8.13                         | 0.10              | 0.04                                              | -3.80                         | 0.09              | 0.26                                              |
| Reactive                      | -17.97                        | 0.21              | 0.03                                              | -7.23                         | 0.13              | 0.01                                              |
| <b>Paradise Alley Deep</b>    |                               |                   |                                                   |                               |                   |                                                   |
| Sterile                       | -4.73                         | 0.18              | 0.01                                              | +1.80                         | 0.07              | 0.06                                              |
| Sterile                       | -1.53                         | 0.08              | 0.21                                              | +0.93                         | 0.04              | 0.45                                              |
| Reactive                      | -6.43                         | 0.08              | 0.01                                              | -1.93                         | 0.11              | 0.29                                              |
| Reactive                      | -12.20                        | 0.20              | 0.01                                              | -9.87                         | 0.44              | 0.16                                              |
| <b>Paradise Alley Shallow</b> |                               |                   |                                                   |                               |                   |                                                   |
| Sterile                       | -5.10                         | 0.23              | 0.08                                              | -7.80                         | 0.37              | 0.18                                              |
| Sterile                       | -10.70                        | 0.39              | 0.02                                              | -9.13                         | 0.46              | 0.02                                              |
| Reactive                      | -23.03                        | 0.29              | 0.02                                              | -0.00                         | 0.00              | 1.00                                              |
| Reactive                      | -24.33                        | 0.32              | 0.08                                              | -5.50                         | 0.25              | 0.02                                              |
| <b>Controls</b>               |                               |                   |                                                   |                               |                   |                                                   |
| Sterile                       | +1.13                         | 0.01              | 0.26                                              | -1.72                         | 0.01              | 0.35                                              |
| Reactive                      | +0.01                         | 0.01              | 0.23                                              | +0.01                         | 0.01              | 0.57                                              |

<sup>1</sup>Negative values indicate mass loss, and positive values indicate gain.

<sup>2</sup>Significance was evaluated from unpaired Student's *t*-tests, with *P*-values ≤0.05 being considered significant.
