# Supplementary material
Source: PubMed Central journal article supplement (PMC3555096)
Supplement: ismej2012105x6.pdf [file ismej2012105x6.pdf]

## Supplementary Figure S1

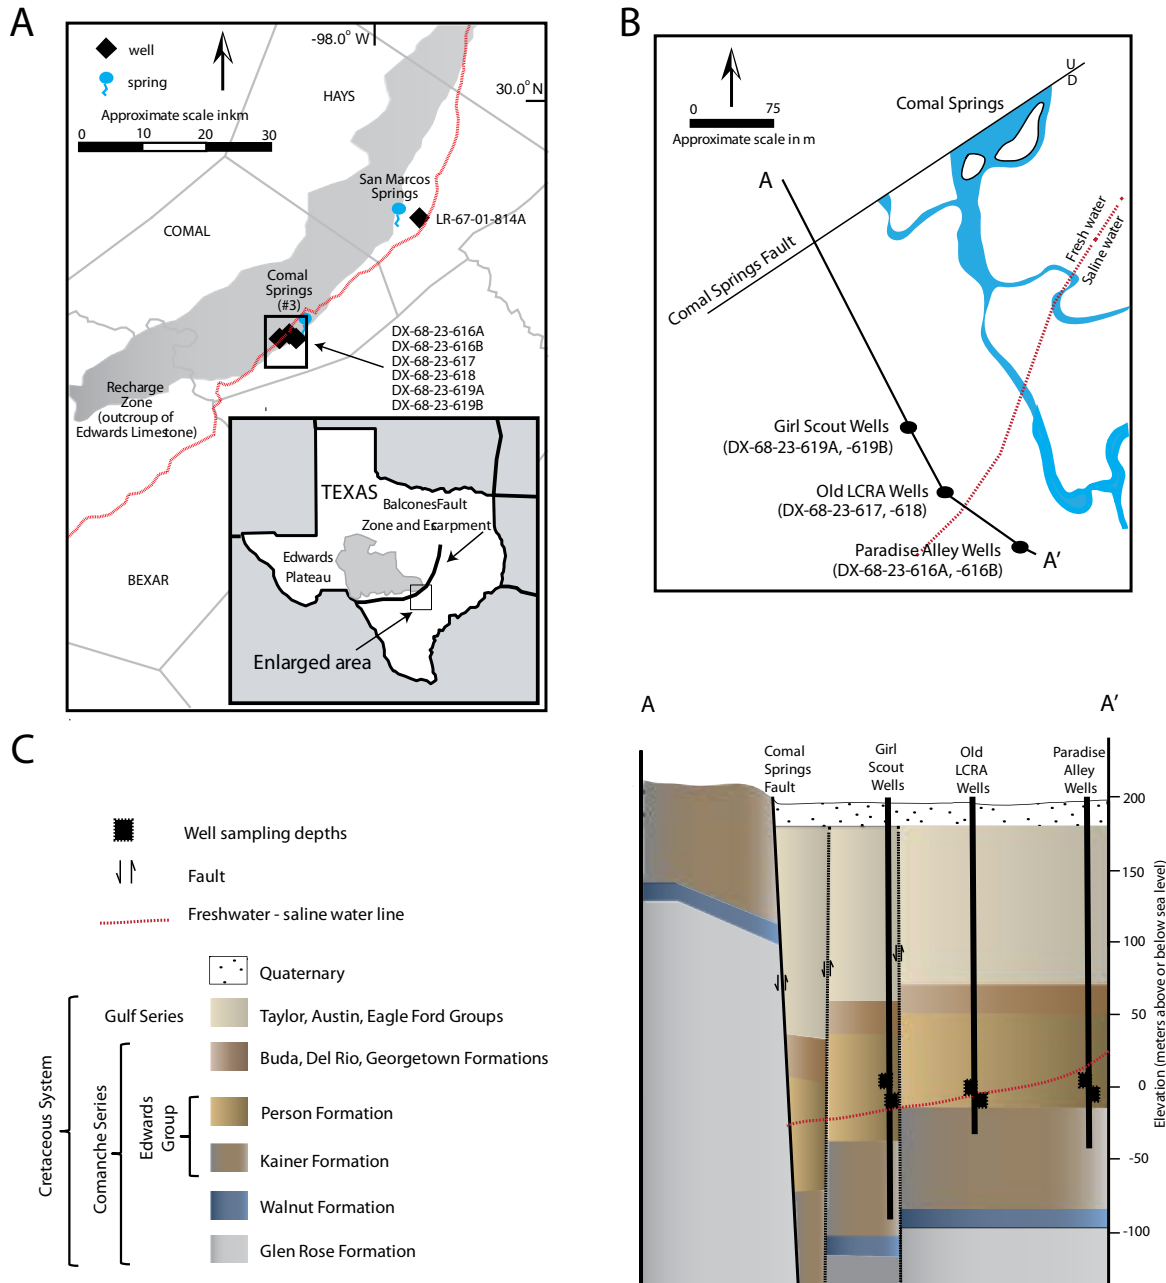

(A) Location map for sample sites in Comal and Hays counties in central Texas, within the transition zone between the fresh and saline waters of the Edwards Aquifer. Six non-pumping observation wells in Comal County and one saline well in Hays County were part of the study. (B) The transition zone is approx. 1 km across, and includes the following wells: #DX-68-23-619A (Girl Scout Deep) and -619B (Girl Scout Shallow), #DX-68-23-617 (LCRA Deep) and -618 (LCRA Shallow), #DX-68-23-616A (Paradise Alley Shallow) and -616B (Paradise Alley Deep) (Supplementary Table S1). (C) Stratigraphic cross-section of the well transect. Screened intervals occurred at depths of ~158 to 228 m, and all wells were completed within the Cretaceous Edwards Group carbonates.

C.J. Gray and A.S. Engel - "Microbial diversity and impact on carbonate geochemistry across a changing geochemical gradient in a karst aquifer"
