# Supplementary material
Source: PubMed Central journal article supplement (PMC3555096)
Supplement: ismej2012105x7.pdf [file ismej2012105x7.pdf]

## Supplementary Figure S2

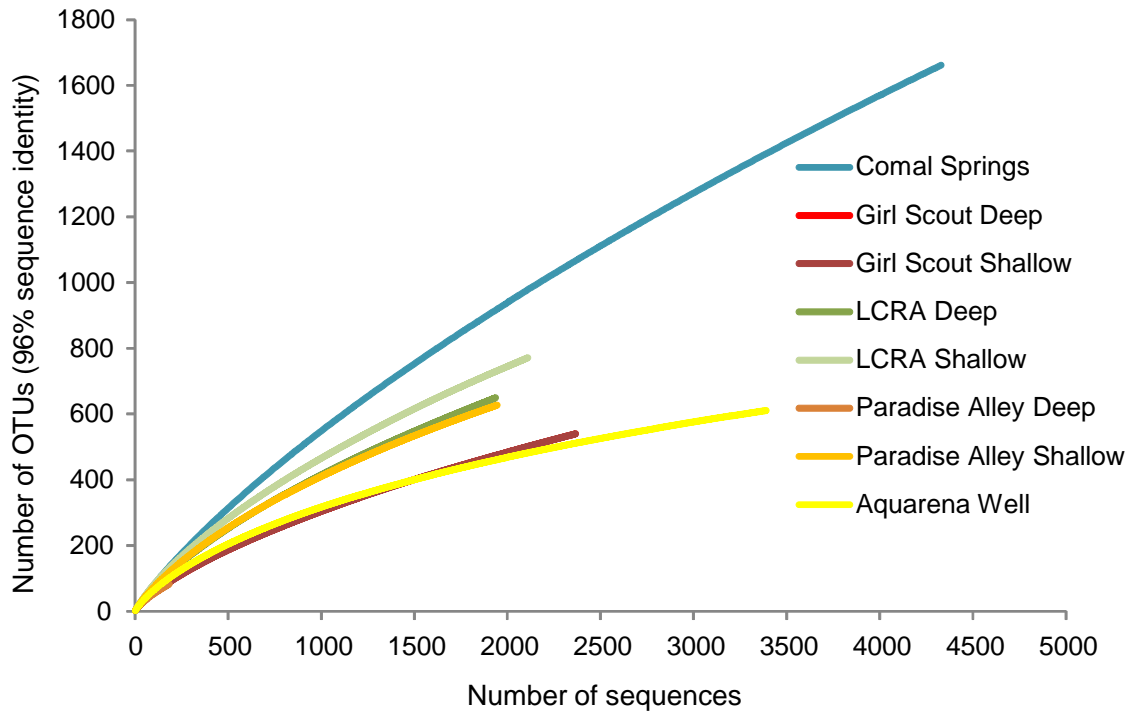

Rarefaction curves of the number of 454 tag pyrosequences versus the estimated number of operational taxonomic units (OTUs), identified at 96% sequence identity, per well sample.
