# Supplementary material
Source: PubMed Central journal article supplement (PMC3555096)

### Supplementary Figure S3

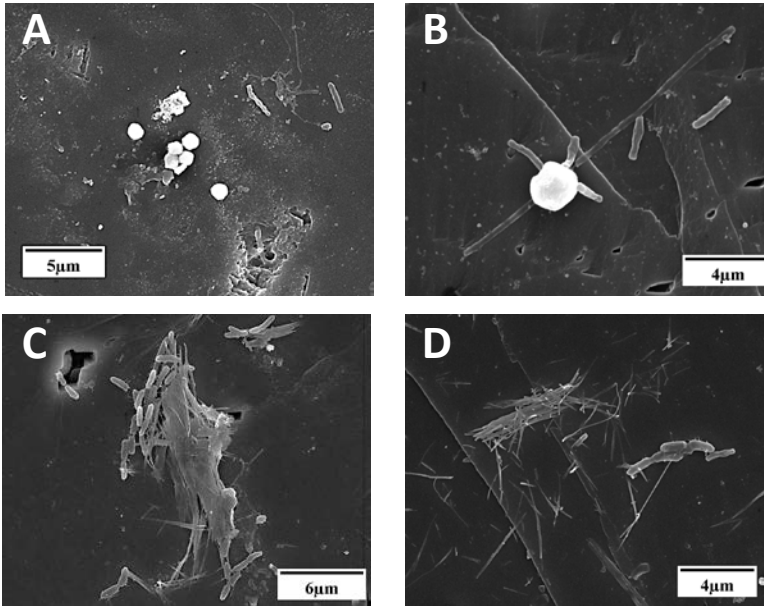

Secondary precipitates on experimental carbonate chip surfaces. Precipitate on (A) a reactive dolomite chip from Girl Scout Shallow and (B) reactive dolomite chip from Paradise Alley Shallow. (C) Silica-bearing clay-like mineral on dolomite chip from LCRA Shallow and (D) calcite from LCRA Shallow. (E) EDAX spectra for Fe-S bearing precipitates, and (F) EDAX spectra for Si-bearing minerals.

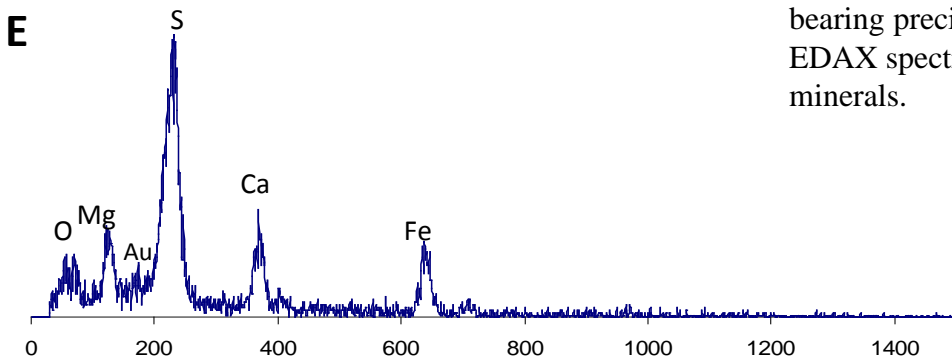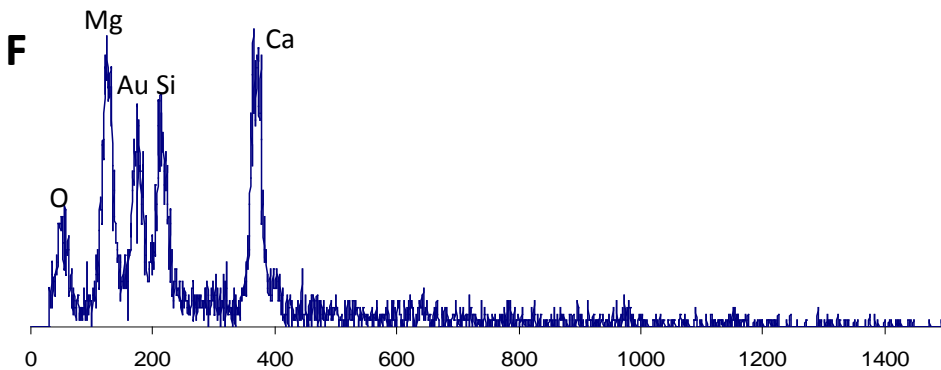

Supplement: ismej2012105x8.pdf [file ismej2012105x8.pdf]
